# Supplementary material
Source: PubMed Central journal article supplement (PMC7067600)

**Supplementary Table 1. Comparison of *Gallus gallus* (gg) and *Mus musculus* (mm) FANCI and FANCD2 structures**

|                    | Q-score/ $N_{\text{align}}$ /RMSD*<br>(FANCD2) | Q-score/ $N_{\text{align}}$ /RMSD*<br>(FANCI) |
|--------------------|------------------------------------------------|-----------------------------------------------|
| ggD2-I vs mmD2-I   | 0.22/820/3.77                                  | 0.27/848/3.16                                 |
| ggubD2-I vs mmD2-I | 0.084/641/5.02                                 | 0.28/794/2.73                                 |
| ggD2 vs mmD2-I     | 0.25/812/3.19                                  | n/a                                           |
| ggubD2-I vs ggD2-I | 0.17/758/4.24                                  | 0.27/732/2.80                                 |
| ggubD2-I vs ggD2   | 0.19/785/3.91                                  | n/a                                           |

\*Calculations were performed using PDBeFOLD (<http://www.ebi.ac.uk/msd-srv/ssm/>). Q-score represents the quality function of C $\alpha$ -alignment, maximized by the SSM alignment algorithm. Quality of alignment takes both the alignment length and root-mean squared deviation (RMSD) into account, reaching a value of 1 only for identical structures.  $N_{\text{align}}$  is the number of matched residues, calculated from the best 3D superposition of query and target structures. The residues are aligned in 3D on the basis of their spatial closeness. The orientation of the structures is optimized such as to minimize RMSD and to maximize the number of aligned residues. Note that when there are substantial conformational changes,  $N_{\text{align}}$  decreases (e.g. ggubD2-I vs mmD2-I).

**Supplementary Table 3. DNA oligonucleotides used in this study.**

| Name          | Sequence (5' to 3')                                  | nt |
|---------------|------------------------------------------------------|----|
| 44-P1/36-FAM/ | ATCGATGTCTCTAGACAGCTGCTCAGGATTGATCTGTAATGGCC/36-FAM/ | 44 |
| 39-P1/36-FAM/ | ATCGATGTCTCTAGACAGCTGCTCAGGATTGATCTGTAA/36-FAM/      | 39 |
| 34-P1/36-FAM/ | ATCGATGTCTCTAGACAGCTGCTCAGGATTGATC/36-FAM/           | 34 |
| 29-P1/36-FAM/ | ATCGATGTCTCTAGACAGCTGCTCAGGAT/36-FAM/                | 29 |
| 24-P1/36-FAM/ | ATCGATGTCTCTAGACAGCTGCTC/36-FAM/                     | 24 |
| 19-P1/36-FAM/ | ATCGATGTCTCTAGACAGC/36-FAM/                          | 19 |
| 14-P1/36-FAM/ | ATCGATGTCTCTAG/36-FAM/                               | 14 |
| 10-P1/36-FAM/ | ATCGATGTCT/36-FAM/                                   | 10 |
| 44-P1         | ATCGATGTCTCTAGACAGCTGCTCAGGATTGATCTGTAATGGCC         | 44 |
| 44-P7         | GGCCATTACAGATCAATCCTGAGCAGCTGTCTAGAGACATCGAT         | 44 |
| 39-P1         | ATCGATGTCTCTAGACAGCTGCTCAGGATTGATCTGTAA              | 39 |
| 39-P7         | TTACAGATCAATCCTGAGCAGCTGTCTAGAGACATCGAT              | 39 |
| 34-P1         | ATCGATGTCTCTAGACAGCTGCTCAGGATTGATC                   | 34 |
| 34-P7         | GATCAATCCTGAGCAGCTGTCTAGAGACATCGAT                   | 34 |
| 29-P1         | ATCGATGTCTCTAGACAGCTGCTCAGGAT                        | 29 |
| 29-P7         | ATCCTGAGCAGCTGTCTAGAGACATCGAT                        | 29 |
| 24-P1         | ATCGATGTCTCTAGACAGCTGCTC                             | 24 |
| 24-P7         | GAGCAGCTGTCTAGAGACATCGAT                             | 24 |
| 19-P1         | ATCGATGTCTCTAGACAGC                                  | 19 |
| 19-P7         | GCTGTCTAGAGACATCGAT                                  | 19 |
| 14-P1         | ATCGATGTCTCTAG                                       | 14 |
| 14-P7         | CTAGAGACATCGAT                                       | 14 |
| 10-P1         | ATCGATGTCT                                           | 10 |
| 10-P7         | AGACATCGAT                                           | 10 |
| X1            | GCGCACCAAGAGATACGCGGTGCAATGCCGAGTAGCCATCAGCG         | 44 |
| X2            | ACCATGCAGCTACTCGGCATTCGACCGGTATCTGGCGACTACG          | 44 |
| X3            | TATCTCTTGGTGCGC                                      | 15 |
| X4            | CGCTGATGGCTACTC                                      | 15 |
| X5            | CGTAGTCGCCAGATA                                      | 15 |
| X6            | GAGTAGCTGCATGGT                                      | 15 |

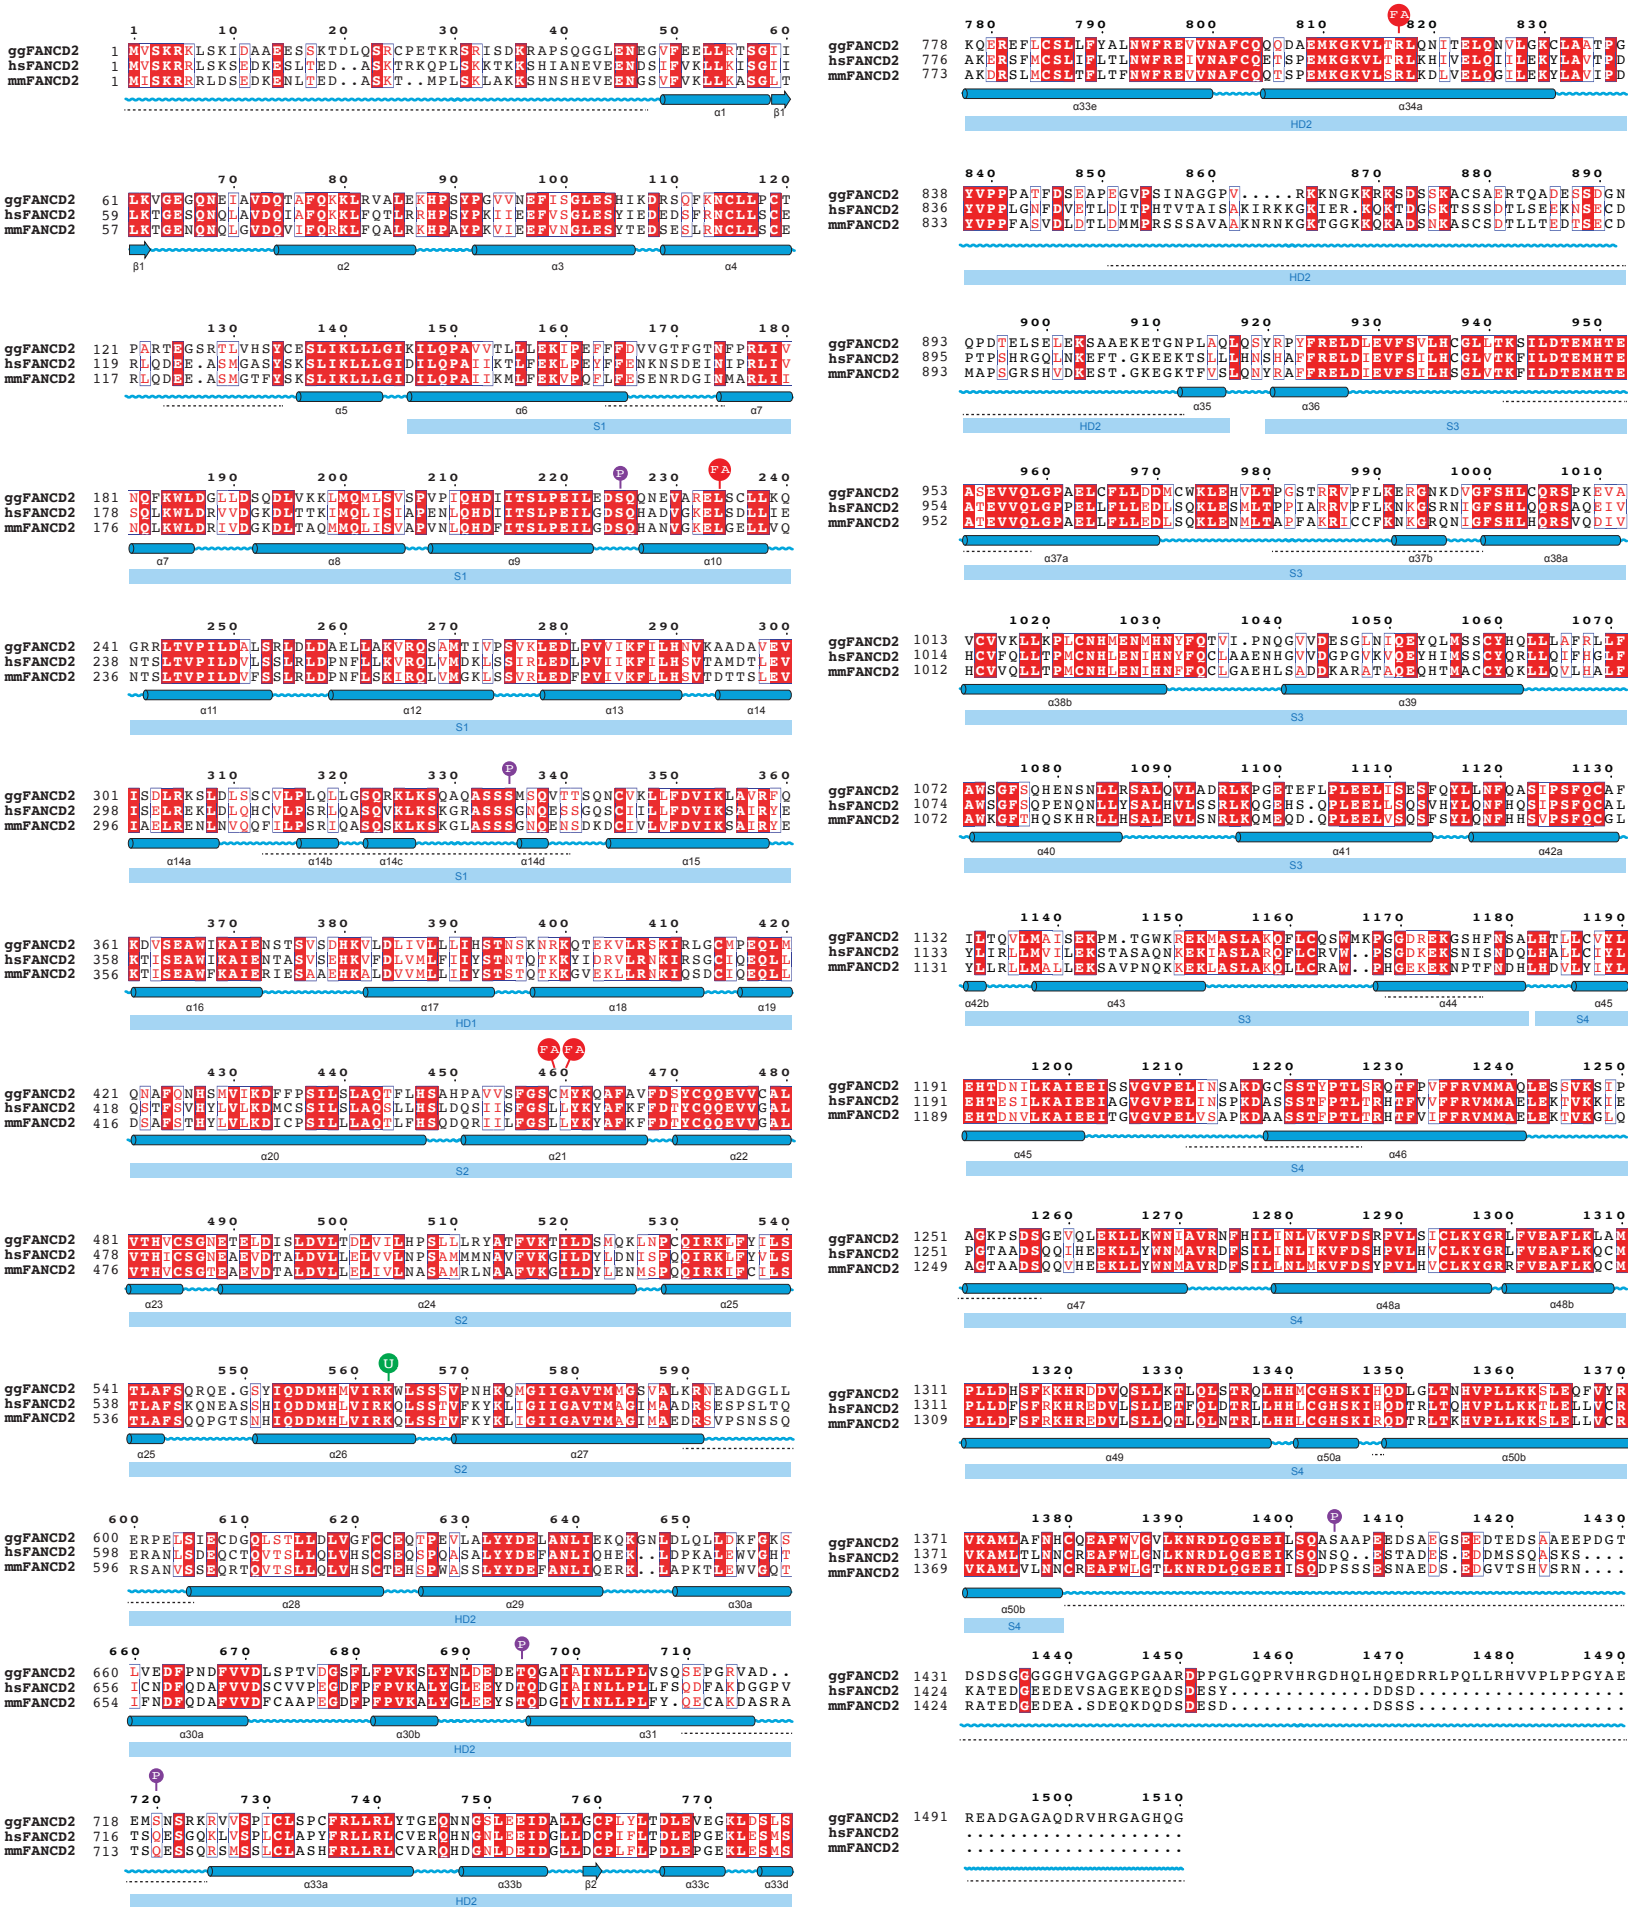





Fig. 1b

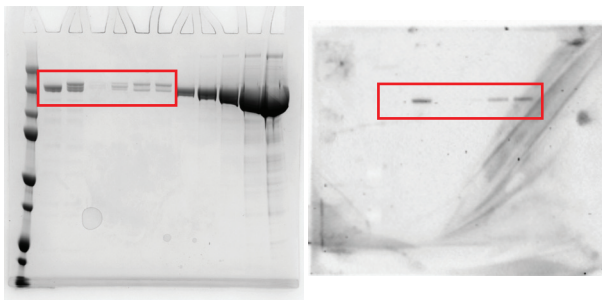

Extended Data Fig. 3

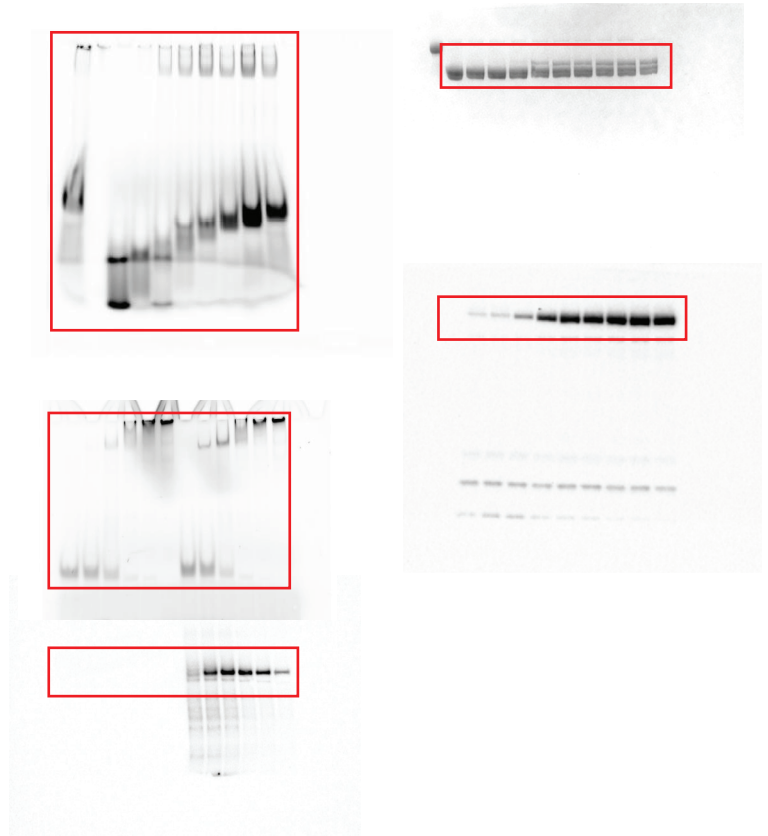

Fig. 4

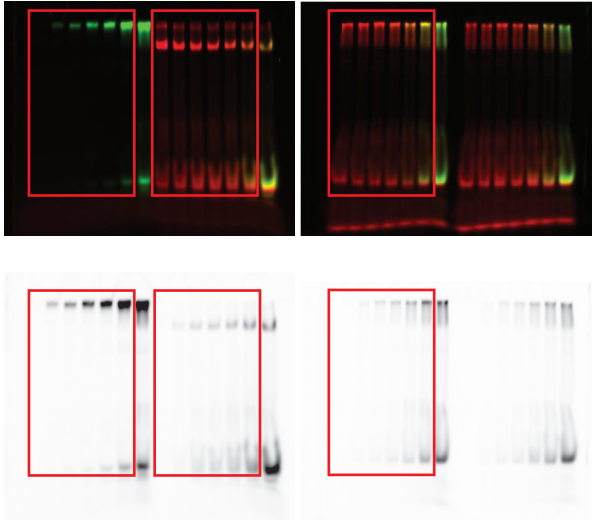

Extended Data Fig. 4a

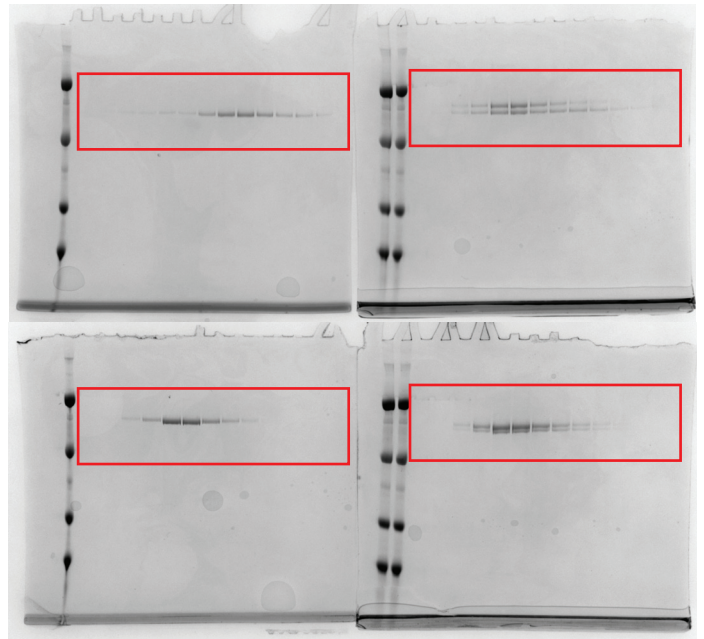

Fig. 5a and Extended Data Fig. 4b

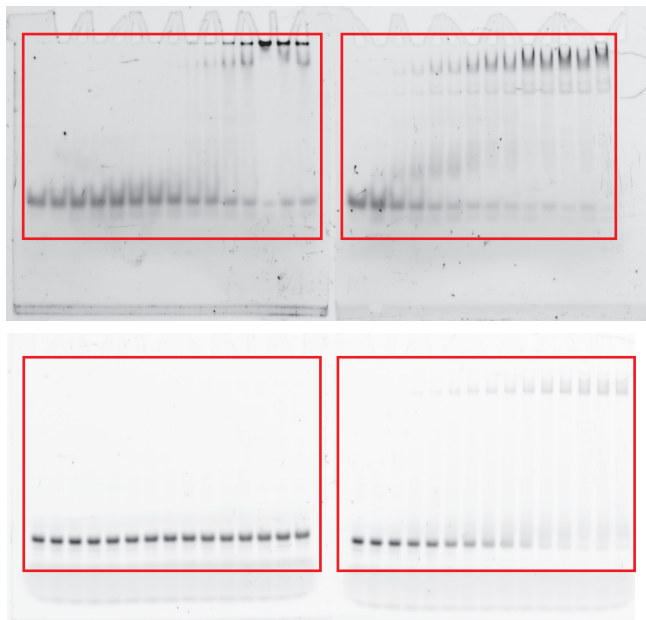

Extended Data Fig. 5

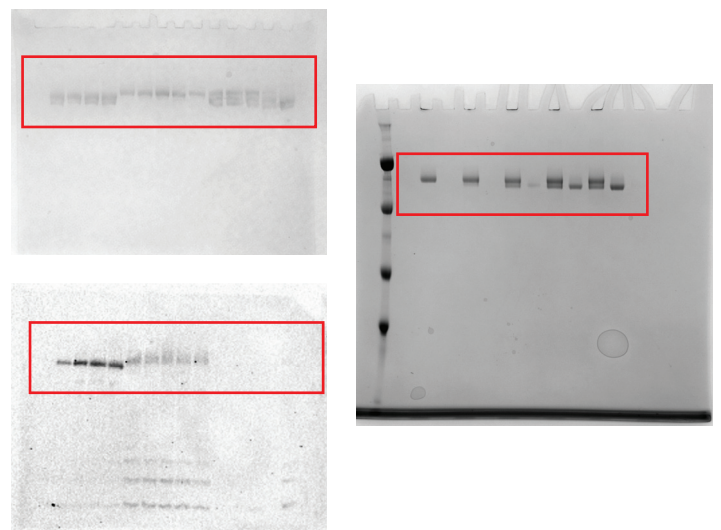

Extended Data Fig. 1a

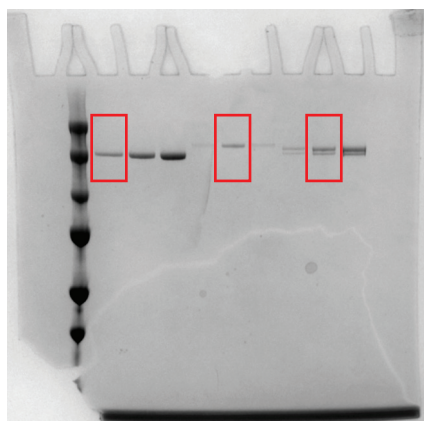

Supplement: EMS85465-supplement-Suplementary_Information.pdf [file EMS85465-supplement-Suplementary_Information.pdf]
